# Supplementary material for: SuccinSite: a computational tool for the prediction of protein succinylation sites by exploiting the amino acid patterns and properties
Source: Royal Society of Chemistry journal article supplement (doi:10.1039/c5mb00853k), 2015-12-17
Supplement: c5mb00853k1.pdf [file c5mb00853k1.pdf]

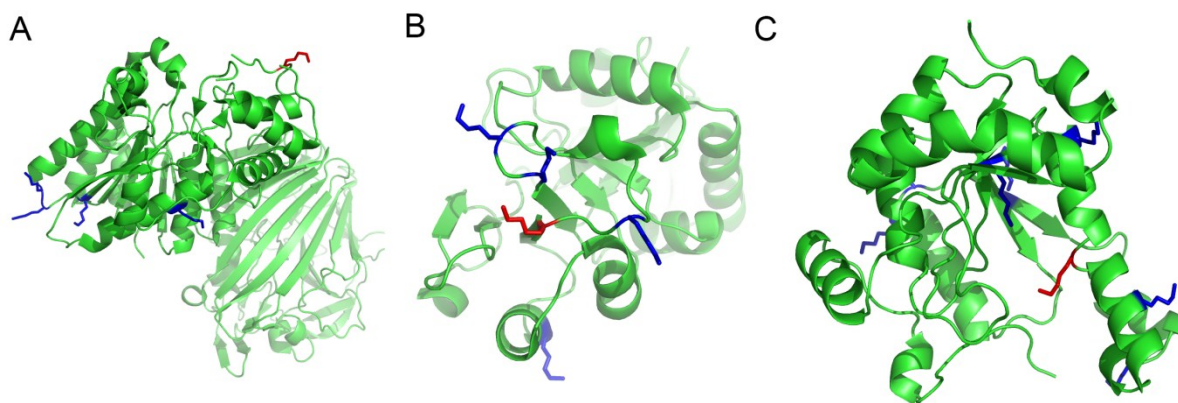

Fig. S1 Cartoon illustrations of exemplar local three dimensional structures around succinylation sites. (A) Cartoon illustration of PDB:1Z45, chain A, the succinylation site (K229) and flanking non-succinylation sites (K182,K183,K186,K256) are colored red and blue, respectively. (B) Cartoon illustration of PDB:1KK9, chain A, the succinylation site (K102) and flanking non-succinylation sites (K90,K105,K115,K117) are colored red and blue, respectively. (C) Cartoon illustration of PDB:1SUR, chain A, the succinylation site (K135) and flanking non-succinylation sites (K95,K97,K101,K118,K129,K144,K177) are colored red and blue, respectively.
