# Supplementary material for: SuccinSite: a computational tool for the prediction of protein succinylation sites by exploiting the amino acid patterns and properties
Source: Royal Society of Chemistry journal article supplement (doi:10.1039/c5mb00853k), 2015-12-17
Supplement: c5mb00853k2.pdf [file c5mb00853k2.pdf]

A

# SuccinSite

## Succinylation Sites Prediction Online Server

[INTRODUCTION](#)

[PREDICTION](#)

[DATABASE](#)

[HELP](#)

Input your protein sequence here. The sequence should be in **FASTA** format.

[Example](#)

 

Please be patient after submitting and do not close this page.

### User Statistics

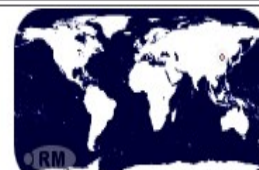

### Input Your Job ID

Please input your job ID in the box to query your prediction result (e.g.201404292009)

The result will be retrieved for one month in our website

B

# SuccinSite Succinylation Sites Prediction Online Server

[INTRODUCTION](#)

[PREDICTION](#)

[DATABASE](#)

[HELP](#)

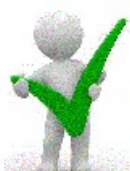

Your work has been done!

Your Job ID: 20150905153817

## Job List

Text format

| Protein Name | Lysine Position | Combined RF Scores | Justification     |
|--------------|-----------------|--------------------|-------------------|
| P62888       | K5              | 0.312              | Non Succinylation |
| P62888       | K6              | 0.220              | Non Succinylation |
| P62888       | K8              | 0.251              | Non Succinylation |
| P62888       | K9              | 0.253              | Non Succinylation |
| P62888       | K23             | 0.372              | Non Succinylation |
| P62888       | K26             | 0.389              | Non Succinylation |
| P62888       | K32             | 0.465              | Succinylation     |
| P62888       | K36             | 0.361              | Non Succinylation |
| P62888       | K42             | 0.324              | Non Succinylation |
| P62888       | K44             | 0.290              | Non Succinylation |
| P62888       | K57             | 0.254              | Non Succinylation |
| P62888       | K68             | 0.300              | Non Succinylation |
| P62888       | K87             | 0.283              | Non Succinylation |
| P62888       | K115            | 0.121              | Non Succinylation |
| P09382       | K13             | 0.425              | Succinylation     |
| P09382       | K29             | 0.464              | Succinylation     |
| P09382       | K37             | 0.442              | Succinylation     |
| P09382       | K64             | 0.422              | Succinylation     |
| P09382       | K100            | 0.324              | Non Succinylation |
| P09382       | K108            | 0.434              | Succinylation     |
| P09382       | K128            | 0.329              | Non Succinylation |
| P09382       | K130            | 0.266              | Non Succinylation |

Legend:

| Label         | Score range       | Sensitivity | Specificity |
|---------------|-------------------|-------------|-------------|
| Succinylation | Score $\geq$ 0.42 | 44.02%      | 90.06%      |

**Fig. S2** (A) The input page of SuccinSite server. Users can submit the query sequence by pasting into the text box. (B) The output page of SuccinSite server. Users can see result of the query sequences.
