# Supplementary material for: SuccinSite: a computational tool for the prediction of protein succinylation sites by exploiting the amino acid patterns and properties
Source: Royal Society of Chemistry journal article supplement (doi:10.1039/c5mb00853k), 2015-12-17
Supplement: c5mb00853k3.pdf [file c5mb00853k3.pdf]

**Table S1** The impact of window sizes on the performance of SuccinSite.

| Window Size | AUC   |
|-------------|-------|
| 15          | 0.715 |
| 17          | 0.732 |
| 19          | 0.738 |
| 21          | 0.755 |
| 23          | 0.793 |
| 25          | 0.798 |
| 27          | 0.802 |
| 29          | 0.801 |
