# Supplementary material for: SuccinSite: a computational tool for the prediction of protein succinylation sites by exploiting the amino acid patterns and properties
Source: Royal Society of Chemistry journal article supplement (doi:10.1039/c5mb00853k), 2015-12-17
Supplement: c5mb00853k4.pdf [file c5mb00853k4.pdf]

**Table S2** The most 50 important CKSAAP encoding mRMR feature scores and their corresponding amino acid pairs are presented.

| Ranks | Scores | Pairs   | Ranks | Scores | Pairs   |
|-------|--------|---------|-------|--------|---------|
| 1     | 0.03   | E×L     | 26    | 0.011  | N××××W  |
| 2     | 0.018  | A×××Y   | 27    | 0.011  | G×××G   |
| 3     | 0.017  | P×F     | 28    | 0.011  | M××××G  |
| 4     | 0.017  | MF      | 29    | 0.011  | K×Y     |
| 5     | 0.016  | Y××××V  | 30    | 0.011  | PV      |
| 6     | 0.016  | KD      | 31    | 0.01   | A××××Y  |
| 7     | 0.015  | V×××V   | 32    | 0.01   | K×K     |
| 8     | 0.015  | G×××P   | 33    | 0.01   | R××××F  |
| 9     | 0.014  | DL      | 34    | 0.01   | Q××××E  |
| 10    | 0.014  | E××××E  | 35    | 0.01   | F××G    |
| 11    | 0.014  | RI      | 36    | 0.01   | M××××K  |
| 12    | 0.013  | S××××H  | 37    | 0.01   | TN      |
| 13    | 0.014  | M××S    | 38    | 0.01   | LV      |
| 14    | 0.014  | G×××××E | 39    | 0.01   | I×××××A |
| 15    | 0.013  | D×A     | 40    | 0.01   | G×××D   |
| 16    | 0.013  | VF      | 41    | 0.01   | M××××M  |
| 17    | 0.013  | Y×××A   | 42    | 0.009  | RK      |
| 18    | 0.012  | P××D    | 43    | 0.009  | K×××V   |
| 19    | 0.012  | LN      | 44    | 0.009  | K×××D   |
| 20    | 0.012  | TT      | 45    | 0.009  | PE      |
| 21    | 0.012  | K××××D  | 46    | 0.009  | M××L    |
| 22    | 0.011  | G×D     | 47    | 0.009  | Q×N     |
| 23    | 0.011  | T××D    | 48    | 0.009  | D×V     |
| 24    | 0.011  | EW      | 49    | 0.009  | SM      |
| 25    | 0.011  | P××××F  | 50    | 0.009  | N×××T   |

For example, the feature 'ExL' represents a 1-spaced residue (any amino acid) pair of 'EL', where x stands for any amino acid. And the same representation was applied to other *k*-spaced residue pairs.
