# Supplementary material for: SuccinSite: a computational tool for the prediction of protein succinylation sites by exploiting the amino acid patterns and properties
Source: Royal Society of Chemistry journal article supplement (doi:10.1039/c5mb00853k), 2015-12-17
Supplement: c5mb00853k5.pdf [file c5mb00853k5.pdf]

**Table S3** The most 50 important binary encoding mRMR feature scores, window positions and corresponding amino acids are presented.

| <b>Ranks</b> | <b>Score</b> | <b>Window</b>    | <b>Amino</b> | <b>Ranks</b> | <b>Scores</b> | <b>Window</b>    | <b>Amino</b> |
|--------------|--------------|------------------|--------------|--------------|---------------|------------------|--------------|
|              | <b>s</b>     | <b>positions</b> | <b>acids</b> |              |               | <b>positions</b> | <b>acids</b> |
| 1            | 0.05         | -4               | K            | 26           | 0.004         | +13              | C            |
| 2            | 0.031        | -9               | K            | 27           | 0.004         | +2               | F            |
| 3            | 0.028        | -13              | D            | 28           | 0.004         | +3               | R            |
| 4            | 0.015        | -7               | R            | 29           | 0.003         | -1               | Q            |
| 5            | 0.013        | +11              | Y            | 30           | 0.003         | +6               | V            |
| 6            | 0.008        | -6               | D            | 31           | 0.003         | +3               | F            |
| 7            | 0.008        | -4               | D            | 32           | 0.003         | -4               | E            |
| 8            | 0.007        | -6               | L            | 33           | 0.003         | -11              | C            |
| 9            | 0.006        | -10              | A            | 34           | 0.003         | +9               | D            |
| 10           | 0.006        | -2               | W            | 35           | 0.003         | +13              | Y            |
| 11           | 0.006        | +12              | V            | 36           | 0.003         | +2               | F            |
| 12           | 0.006        | +3               | K            | 37           | 0.003         | -10              | H            |
| 13           | 0.005        | +10              | E            | 38           | 0.003         | -9               | F            |
| 14           | 0.005        | -4               | E            | 39           | 0.003         | -11              | G            |
| 15           | 0.005        | +10              | A            | 40           | 0.003         | +2               | M            |
| 16           | 0.005        | -6               | N            | 41           | 0.003         | -6               | Y            |
| 17           | 0.005        | +5               | F            | 42           | 0.003         | +11              | W            |
| 18           | 0.004        | +8               | S            | 43           | 0.003         | +5               | I            |
| 19           | 0.004        | +4               | H            | 44           | 0.003         | +11              | Q            |
| 20           | 0.004        | +1               | E            | 45           | 0.003         | -6               | V            |
| 21           | 0.004        | -13              | V            | 46           | 0.003         | -1               | P            |
| 22           | 0.004        | +2               | Y            | 47           | 0.003         | -9               | V            |
| 23           | 0.004        | -8               | C            | 48           | 0.002         | -13              | K            |
| 24           | 0.004        | +7               | H            | 49           | 0.002         | -9               | V            |
| 25           | 0.004        | +5               | M            | 50           | 0.002         | -13              | N            |
