# Supplementary material for: SuccinSite: a computational tool for the prediction of protein succinylation sites by exploiting the amino acid patterns and properties
Source: Royal Society of Chemistry journal article supplement (doi:10.1039/c5mb00853k), 2015-12-17
Supplement: c5mb00853k6.pdf [file c5mb00853k6.pdf]

**Table S4** The most 50 important AAindex mRMR features scores, amino acids with window positions and corresponding properties are presented.

| Ranks | Scores | Amino acids<br>with window<br>positions | Properties | Descriptions                                          |
|-------|--------|-----------------------------------------|------------|-------------------------------------------------------|
| 1     | 0.025  | (T, -3)                                 | RADA880107 | Energy transfer from out to in(95%buried)             |
| 2     | 0.015  | (P, +11)                                | YUTK870102 | Unfolding Gibbs energy in water, pH9.0                |
| 3     | 0.009  | (I, +9)                                 | RACS820102 | Average relative fractional occurrence in AR          |
| 4     | -0.002 | (W, -9)                                 | VHEG790101 | Transfer free energy to lipophilic phase              |
| 5     | -0.007 | (E, -3)                                 | RICJ880117 | Relative preference value at C                        |
| 6     | -0.022 | (A, +3)                                 | ZASB820101 | Dependence of partition coefficient on ionic strength |
| 7     | -0.017 | (L, +10)                                | RICJ880107 | Relative preference value at N4                       |
| 8     | -0.028 | (H,+12)                                 | RADA880103 | Transfer free energy from vap to chx                  |
| 9     | -0.024 | (K, -3)                                 | VASM830102 | Relative population of conformational state C         |
| 10    | -0.022 | (Q, +12)                                | RICJ880101 | Relative preference value at N                        |
| 11    | -0.029 | (N, -7)                                 | WERD780103 | Free energy change of alpha(Ri) to alpha(Rh)          |
| 12    | -0.029 | (I, +5)                                 | ROBB760105 | Information measure for extended                      |
| 13    | -0.03  | (F, +13)                                | VASM830102 | Relative population of conformational state C         |
| 14    | -0.027 | (D, -1)                                 | RACS820111 | Average relative fractional occurrence in E0(i-1)     |
| 15    | -0.032 | (T, -13)                                | RICJ880116 | Relative preference value at C'                       |
| 16    | -0.032 | (H, +9)                                 | QIAN880139 | Weights for coil at the window position of 6          |
| 17    | -0.031 | (M, +10)                                | ZIMJ680101 | Hydrophobicity                                        |
| 18    | -0.032 | (E, +6)                                 | ROBB760102 | Information measure for N-terminal helix              |
| 19    | -0.035 | (E, -8)                                 | YUTK870102 | Unfolding Gibbs energy in water, pH9.0                |
| 20    | -0.035 | (V, -13)                                | RICJ880102 | Relative preference value at N'                       |
| 21    | -0.036 | (G, -13)                                | WARP780101 | Average interactions per side chain atom              |
| 22    | -0.037 | (D, -10)                                | TANS770109 | Normalized frequency of coil                          |
| 23    | -0.036 | (S, -2)                                 | WOLS870103 | Principal property value z3                           |
| 24    | -0.035 | (V, +1)                                 | RADA880106 | Accessible surface area                               |
| 25    | -0.037 | (E, -11)                                | RICJ880107 | Relative preference value at N4                       |
| 26    | -0.038 | (G, +6)                                 | VHEG790101 | Transfer free energy to lipophilic phase              |
| 27    | -0.037 | (D, -1)                                 | RADA880106 | Accessible surface area                               |
| 28    | -0.039 | (S, +10)                                | VHEG790101 | Transfer free energy to lipophilic phase              |
| 29    | -0.038 | (N,+4)                                  | RACS820111 | Average relative fractional occurrence in E0(i-1)     |
| 30    | -0.037 | (N, +13)                                | RICJ880116 | Relative preference value at C'                       |
| 31    | -0.037 | (D, -8)                                 | RICJ880107 | Relative preference value at N4                       |
| 32    | -0.037 | (Q, +5)                                 | WERD780103 | Free energy change of alpha(Ri) to alpha(Rh)          |
| 33    | -0.039 | (G, -12)                                | WERD780103 | Free energy change of alpha(Ri) to alpha(Rh)          |
| 34    | -0.04  | (Q, -4)                                 | RICJ880117 | Relative preference value at C''                      |
| 35    | -0.039 | (R, -10)                                | RACS820113 | Value of theta(i)                                     |
| 36    | -0.04  | (W, -4)                                 | TANS770108 | Normalized frequency of zeta R                        |
| 37    | -0.041 | (Q, +3)                                 | RICJ880114 | Relative preference value at C1                       |
| 38    | -0.041 | (V, -2)                                 | RICJ880115 | Relative preference value at C-cap                    |
| 39    | -0.043 | (W, -11)                                | RACS770103 | Side chain orientational preference                   |

---

|    |        |          |            |                                                 |
|----|--------|----------|------------|-------------------------------------------------|
| 40 | -0.043 | (P, +2)  | TANS770110 | Normalized frequency of chain reversal          |
| 41 | -0.043 | (N, -10) | WOEC730101 | Polar requirement                               |
| 42 | -0.043 | (L, +2)  | RICJ880111 | Relative preference value at C4                 |
| 43 | -0.045 | (E, +7)  | RICJ880102 | Relative preference value at N'                 |
| 44 | -0.044 | (L, +13) | WOEC730101 | Polar requirement                               |
| 45 | -0.045 | (M, +8)  | ROBB760105 | Information measure for extended                |
| 46 | -0.045 | (N, +2)  | RACS820101 | Average relative fractional occurrence in A0(i) |
| 47 | -0.044 | (M, -2)  | WERD780102 | Free energy change of epsilon(i) to epsilon(ex) |
| 48 | -0.043 | (I, +13) | RICJ880113 | Relative preference value at C2                 |
| 49 | -0.044 | (Q, +6)  | RICJ880102 | Relative preference value at N'                 |
| 50 | -0.043 | (D, +6)  | TANS770108 | Normalized frequency of zeta R                  |

---
